# Supplementary material for: Novel mutations in PLCZ1 lead to early embryonic arrest as a male factor
Source: PubMed Central journal article supplement (PMC10227596; doi:10.3389/fcell.2023.1193248), 2023-05-16
Supplement: DataSheet1.pdf [file DataSheet1.pdf]

## Supplementary Materials

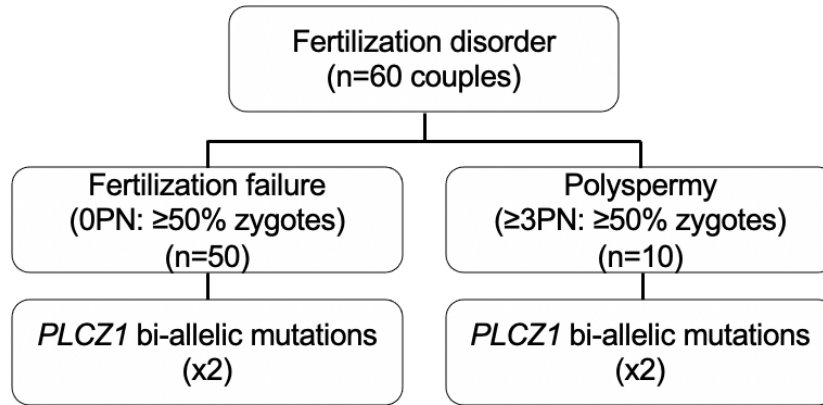

**Figure S1. Cohort in this study and contribution of *PLCZ1* variants.**

**Table S1. Genomic PCR primers used to amplify *PLCZ1* mutations for Sanger sequencing.**

| Sites |   | Primer sequences (5' to 3') | Product Size (bp) |
|-------|---|-----------------------------|-------------------|
| M1    | F | ACCATGAATGCATACTTGTGT       | 242               |
|       | R | ATGGACTCATTATGCATTTA        |                   |
| M2    | F | ATTACACGAGTCTGCTGCTTC       | 210               |
|       | R | GGAGCTGACTTAGAGTCCATC       |                   |
| M3    | F | GCTTCCAGGACAAAAGTTCAA       | 622               |
|       | R | TCAAATGGTGTTTGAGGAGA        |                   |
| M4    | F | TCTCAAACCTTCCTGGCCAT        | 756               |
|       | R | TTGGGAGTAGGGATGTTTCA        |                   |
| M5    | F | GGCTTCAACCCAGATAGGAAT       | 697               |
|       | R | TGCCCTACTGTGAAAATCAA        |                   |
| M6    | F | GCTAAAGAATTGCCTAAGTACATC    | 886               |
|       | R | CTGGTTGCCACCCATCATCA        |                   |

bp, base pairs; F: forward primer; R: reverse primer.

**Table S2. Semen characteristics of men carrying bi-allelic *PLCZ1* variants.**

| Semen Parameters                                  | Patient 1 | Patient 2 | Patient 3 | Patient 4 | Reference Values |
|---------------------------------------------------|-----------|-----------|-----------|-----------|------------------|
| semen liquefaction time (min)                     | 20        | 20        | 20        | 20        | ≤60              |
| Total motile sperm count (10 <sup>6</sup> )       | 58.3      | 190.8     | 98.1      | 240.2     |                  |
| Non-progressive motility (C, %)                   | 9         | 11        | 6         | 10        | 0-60             |
| Progressive motile sperm count (10 <sup>6</sup> ) | 48.8      | 155.2     | 88        | 208.6     |                  |
| Immotile sperm (D) (%)                            | 45        | 41        | 42        | 24        | 0-60             |
| Round cell (10 <sup>6</sup> /ml)                  | 0.2       | 0.2       | 0.2       | 1.3       | 0.1-0.9          |
| Leukocyte (10 <sup>6</sup> /ml)                   | 0.1       | NA        | 0.1       | 0.3       | 0-0.9            |
| Survival rate (eosin) (%)                         | 79        | NA        | 94        | 95        | 58-100           |
| MAR adsorption rate (%)                           | 5         | NA        | 6         | 6         | 0-10             |
| Fructose test                                     | NA        | NA        | positive  | positive  | positive         |
| Sperm DNA fragmentation rate (%)                  | 20.24     | 13.82     | 14.53     | 8.29      | ≤15              |
| Acrosome reaction (%)                             | NA        | NA        | 2         | 5         | 0-10             |
| Morphologically normal sperm (%)                  | 6         | 5         | 6         | 5         |                  |
| Abnormal head (%)                                 | 61        | 69        | 67        | 69        |                  |
| Abnormal midpiece (%)                             | 0         | 1         | 1         | 2         |                  |
| Abnormal Flagella (%)                             | 1         | 2         | 1         | 1         |                  |
| Mixed malformation (%)                            | 32        | 23        | 25        | 23        |                  |

NA, not available

\*Mean Value of 3-4 independent tests

**Table S3. Seminal plasma biochemical parameters of men carrying bi-allelic *PLCZ1* variants.**

| Seminal plasma biochemical parameters | Patient 3 | Patient 4 | Reference Values |
|---------------------------------------|-----------|-----------|------------------|
| Zn (mmol/L)                           | 3.56      | 3.4       | 1.09-4.86        |
| TAG (U/L)                             | 365.87    | 477.69    | 109.63-570.76    |
| NAG (U/L)                             | 29.04     | 41.14     | >10.12           |
| FRU (mmol/L)                          | 24.49     | 9.49      | >6.04            |
| ACP (U/ml)                            | 724.74    | 846.28    | 152-1665         |

\*Mean Value of 3-4 independent tests
